# Supplementary material
Source: PubMed Central journal article supplement (PMC5981076)
Supplement: AEM.00444-18_zam012188554s1.pdf [file AEM.00444-18_zam012188554s1.pdf]

1 **VqsA, A Novel LysR-type Transcriptional Regulator Coordinates Quorum**  
2 **Sensing (QS) and is Controlled by QS to Regulate Virulence in the Pathogen**  
3 ***Vibrio alginolyticus***

4 Xiating Gao<sup>a</sup>, Xuetong Wang<sup>a</sup>, Qiaoqiao Mao<sup>a</sup>, Rongjing Xu<sup>e</sup>, Xiaohui Zhou<sup>c,d</sup>, Yue  
5 Ma<sup>a,b</sup>, Qin Liu<sup>a,b</sup>, Yuanxing Zhang<sup>a,b</sup>, Qiyao Wang<sup>a,b,#</sup>

6 State Key Laboratory of Bioreactor Engineering, East China University of Science  
7 and Technology, Shanghai 200237, China<sup>a</sup>; Shanghai Engineering Research Center of  
8 Maricultured Animal Vaccines, Shanghai, China<sup>b</sup>; Department of Pathobiology and  
9 Veterinary Science, University of Connecticut, Storrs, CT 06269, USA<sup>c</sup>; Jiangsu Key  
10 Laboratory of Zoonosis/Jiangsu Co-Innovation Center for Prevention and Control of  
11 Important Animal Infectious Diseases and Zoonoses, Yangzhou University,  
12 Yangzhou 225009, China<sup>d</sup>; Yantai Tianyuan Aquatic Co. Ltd, Shandong Yantai  
13 264006, China<sup>e</sup>.

14 #Corresponding author: oaiwqiyao@ecust.edu.cn (Qiyao Wang)

15 Tel and Fax: +86-21-64253306.

16

17

18 **Legends for Supplemental Figures**

19 **FIG S1** Diagrams for the modified bacterial one-hybrid (B1H) assay. The promoter  
20 DNA was cloned into the pBXcmT plasmid containing the HIS3 and *aadA* genes,  
21 conferring resistance to 3-amino-1,2,4-triazole (3-AT) and Str. The gene encoding a  
22 TF was cloned into the pTRG vector. Then, the derivative plasmids were  
23 co-transformed into the reporter strain.

24 **FIG S2** Growth curves of the in-frame deletion mutants of the genes encoding  
25 selected TFs. The  $\Delta vqsA$ ,  $\Delta luxR$ ,  $\Delta aphA$  strains as well as the corresponding  
26 complement strains  $vqsA^+$ ,  $luxR^+$ , and  $aphA^+$  are included. The bacterial strains were  
27 inoculated into LBS medium and grown at 30°C for 15 h with shaking.

28 **FIG S3** Identification of transcriptional start site of *vqsA* with 5' rapid amplification  
29 of cDNA ends (5'-RACE) experiment with WT,  $\Delta vqsA$ , or  $\Delta luxR$  strains. The primer  
30 extension products amplified from  $\Delta vqsA$  mutant (lane 1), wild type (lane 2), as well  
31 as  $\Delta luxR$  using primers RACE-adapter/18672-RACE-1 were analyzed on 1% agarose  
32 gels and visualized by ethidium bromide staining. M: DNA Marker.

33 **FIG S4** VqsA is structurally related to the ligand-binding domain of AphB. Phy2 was  
34 used to model VqsA. The tetramer structure of AphB (A) and the monomer structure  
35 model of VqsA (B) are shown and have been superimposed (C, D). The indicated  
36 cysteine (Cys) residues Cys189 and Cys166 in VqsA and Cys235 in AphB are located  
37 at the site that might mediate intramolecular interaction.

38

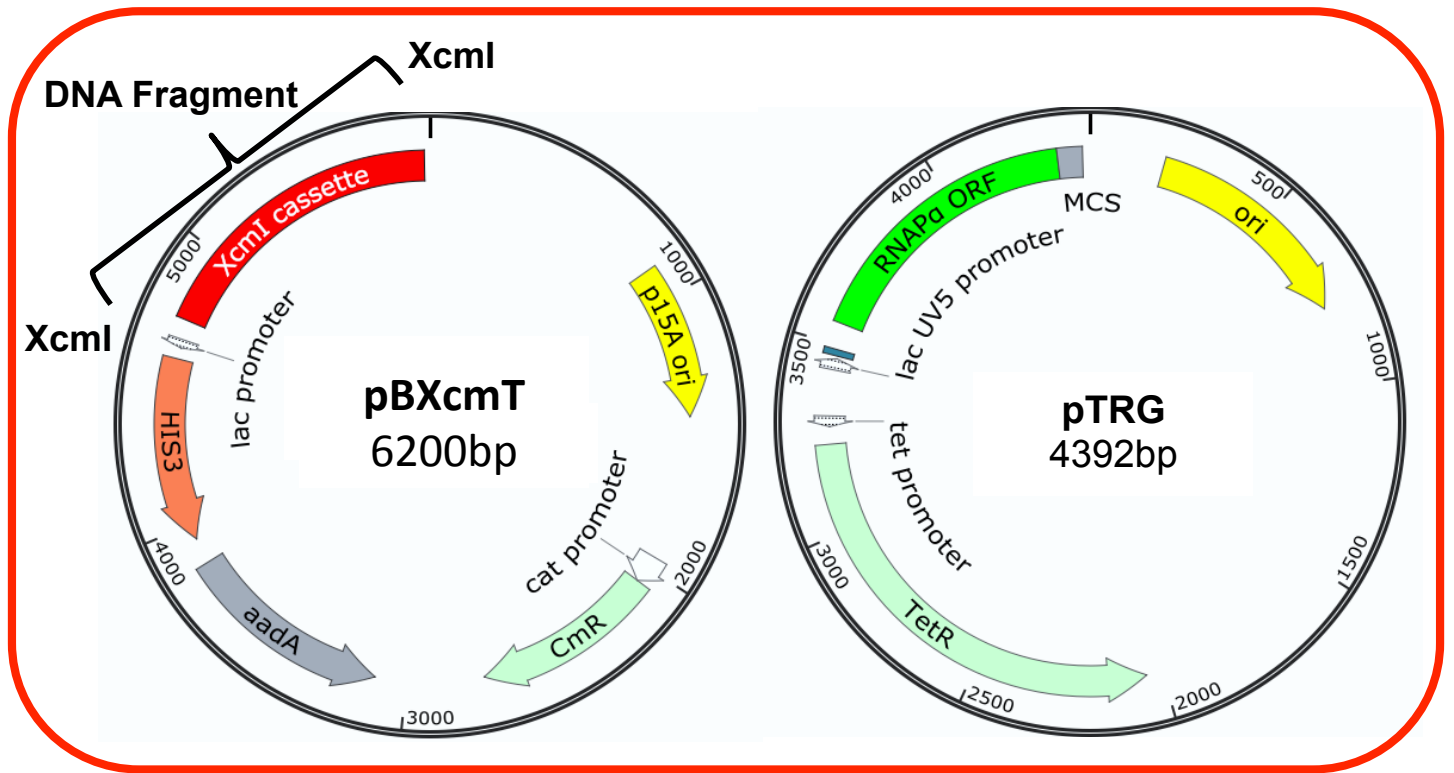

**Fig. S1**

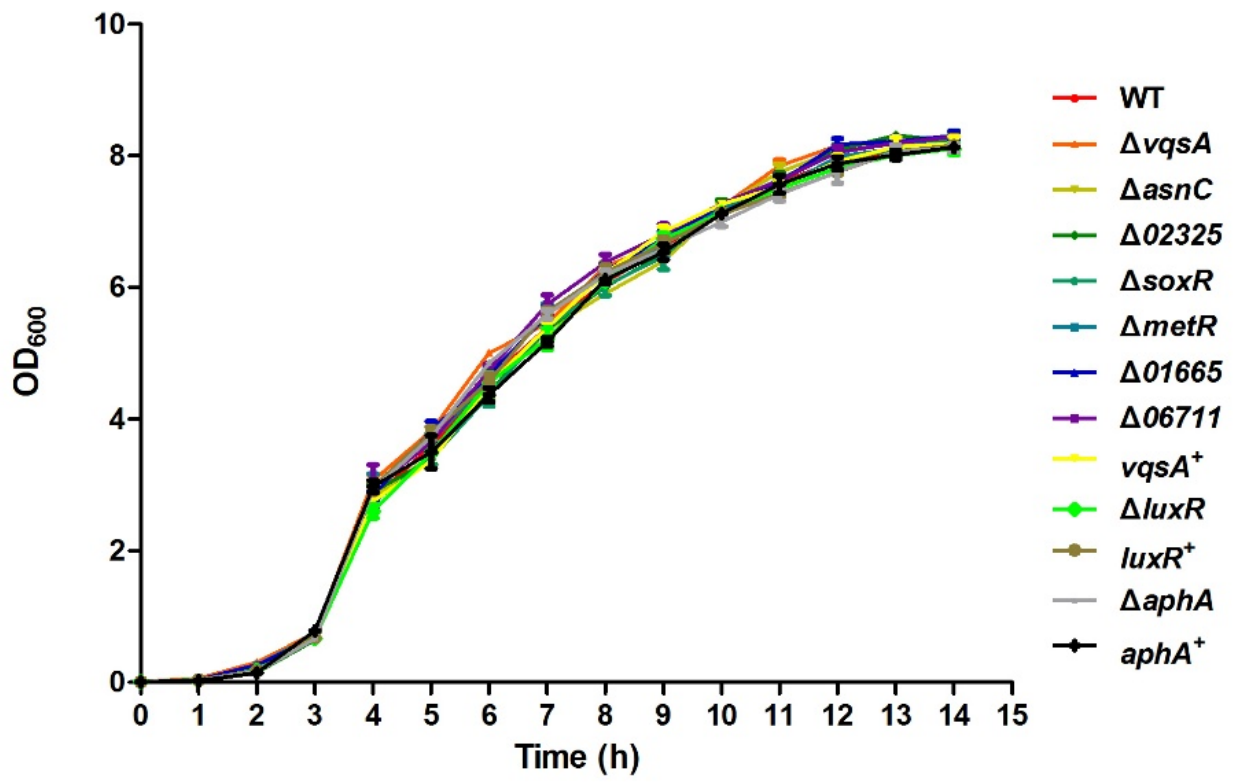

Fig. S2

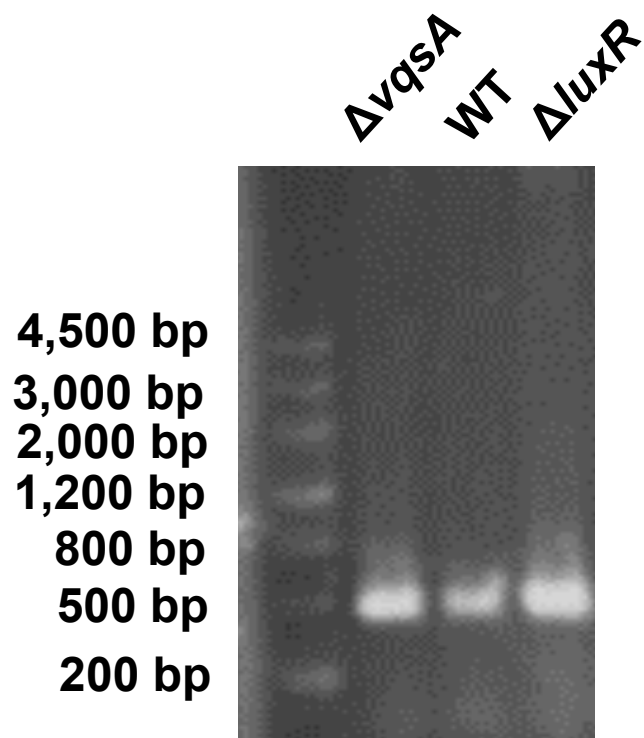

**Fig. S3**

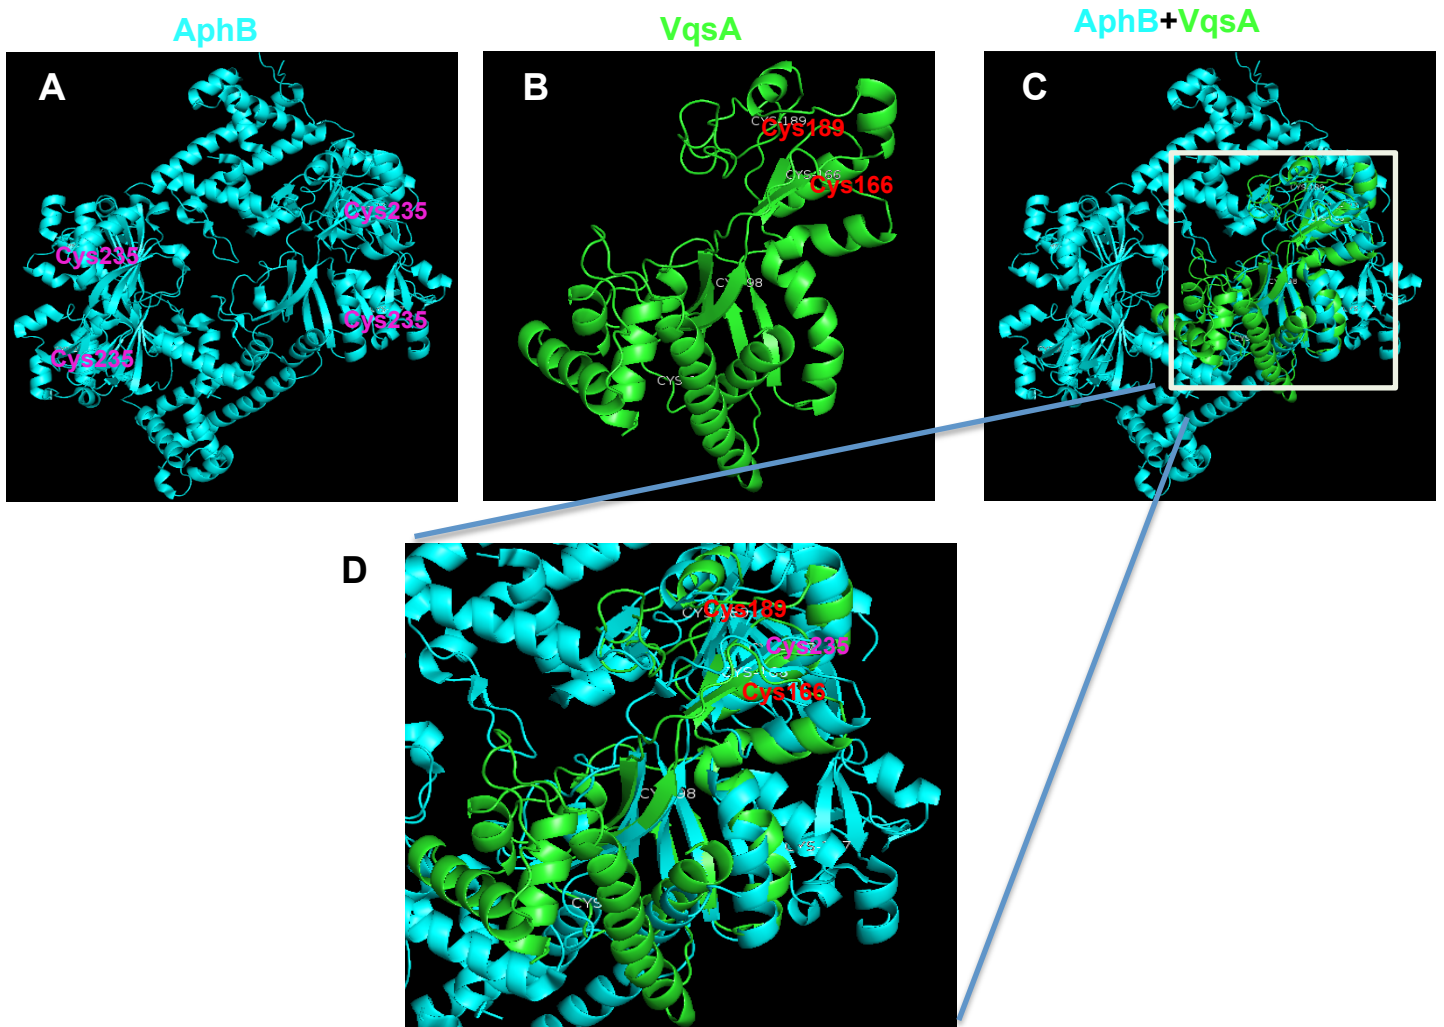

**Fig. S4**

**Table S1 Screen of TFs binding with  $P_{luxR}$  and  $P_{aphA}$** 

| Gene ID <sup>a</sup> | Gene ID <sup>b</sup> | Annotation                                                                                    | Screen of<br>$P_{luxR}$ | Screen of<br>$P_{aphA}$ |
|----------------------|----------------------|-----------------------------------------------------------------------------------------------|-------------------------|-------------------------|
| N646_RS09150         | <b>V12G01-14830</b>  | <b>AphA</b>                                                                                   | ++++                    | ++++                    |
| N646_RS19485         | V12G01-01715         | transcriptional regulator, SorC family protein                                                | -                       | -                       |
| N646_RS14145         | V12G01-05221         | putative glycine cleavage operon activator                                                    | -                       | -                       |
| N646_RS20855         | V12G01-08785         | putative AraC-family transcriptional regulatory protein                                       | ++++                    | -                       |
| N646_RS13825         | V12G01-12890         | putative transcriptional regulator, LysR family protein                                       | -                       | -                       |
| N646_RS20060         | V12G01-01145         | transcriptional regulator BefI                                                                | -                       | -                       |
| N646_RS19970         | V12G01-01235         | putative transcriptional regulator; also putative ATP-binding component of a transport system | -                       | -                       |
| N646_RS22960         | V12G01-06376         | putative transport protein                                                                    | -                       | -                       |
| N646_RS19535         | <b>V12G01-01665</b>  | <b>XRE family transcriptional regulator</b>                                                   | ++++                    | +++                     |
| N646_RS18615         | <b>V12G01-02620</b>  | <b>SoxR protein</b>                                                                           | +++++                   | ++++                    |
| N646_RS11260         | <b>V12G01-10813</b>  | <b>transcriptional regulator AsnC</b>                                                         | +++                     | ++++                    |
| N646_RS11785         | V12G01-11368         | nucleoid occlusion protein                                                                    | -                       | -                       |
| N646_RS21110         | V12G01-08505         | transcriptional regulator, LysR family protein                                                | -                       | -                       |
| N646_RS14830         | V12G01-15705         | N-acetylglucosamine repressor                                                                 | -                       | -                       |
| N646_RS12110         | V12G01-11698         | hypothetical protein                                                                          | -                       | -                       |
| N646_RS01510         | V12G01-19561         | histidine utilization repressor                                                               | -                       | -                       |
| N646_RS23000         | V12G01-06336         | putative transcriptional regulator, AraC/XylS family protein                                  | -                       | -                       |
| N646_RS12395         | V12G01-11943         | YtfJ family protein                                                                           | -                       | -                       |
| N646_RS08250         | V12G01-14004         | hypothetical protein                                                                          | -                       | -                       |
| N646_RS08840         | V12G01-14569         | putative transcriptional regulator                                                            | -                       | -                       |
| N646_RS21395         | V12G01-07978         | putative transcriptional regulator                                                            | -                       | -                       |
| N646_RS17170         | V12G01-04116         | ParB family protein                                                                           | -                       | -                       |
| N646_RS02795         | V12G01-18257         | periplasmic spermidine/putrescine-binding protein                                             | -                       | -                       |
| N646_RS15865         | V12G01-05506         | transcriptional regulator, MerR family protein                                                | -                       | -                       |
| N646_RS17125         | V12G01-04161         | hypothetical protein                                                                          | -                       | -                       |
| N646_RS07310         | V12G01-21963         | putative transcriptional regulator                                                            | -                       | -                       |
| N646_RS16100         | V12G01-05261         | transcriptional regulator, LysR family protein                                                | -                       | -                       |
| N646_RS02240         | V12G01-18837         | transcriptional regulator (DeoR family) protein                                               | -                       | -                       |
| N646_RS05105         | V12G01-16107         | putative transcriptional regulator, LysR family protein                                       | -                       | -                       |
| N646_RS20755         | V12G01-08885         | transcriptional regulator, HTH_3 family protein                                               | -                       | -                       |
| N646_RS22090         | V12G01-07278         | probable transcriptional regulator                                                            | -                       | -                       |
| N646_RS20340         | V12G01-09302         | putative transcriptional regulator, LysR family protein                                       | -                       | ++++                    |
| N646_RS22830         | V12G01-06506         | transcriptional regulator, AraC/XylS family protein                                           | -                       | -                       |
| N646_RS23180         | V12G01-06156         | putative transcriptional regulator                                                            | -                       | -                       |
| N646_RS18530         | V12G01-02715         | putative transcriptional regulator, LysR family protein                                       | -                       | ++++                    |
| N646_RS20725         | V12G01-08915         | transcriptional regulator, LysR family protein                                                | -                       | -                       |
| N646_RS20390         | V12G01-09245         | putative LysR-type regulator                                                                  | -                       | ++++                    |
| N646_RS14075         | V12G01-12620         | hypothetical protein                                                                          | -                       | -                       |

|              |                     |                                                                           |      |       |
|--------------|---------------------|---------------------------------------------------------------------------|------|-------|
| N646_RS19855 | V12G01-01355        | transcriptional regulator of succinylCoA synthetase operon                | -    | -     |
| N646_RS22935 | V12G01-06401        | hypothetical protein                                                      | -    | -     |
| N646_RS20260 | V12G01-09387        | putative transcriptional regulator, AraC/XylS family protein              | -    | -     |
| N646_RS00535 | V12G01-20563        | hypothetical protein                                                      | -    | -     |
| N646_RS12450 | V12G01-11998        | thiamin ABC transporter, periplasmic thiamin-binding protein              | -    | -     |
| N646_RS16975 | V12G01-04326        | putative transcriptional regulator                                        | -    | -     |
| N646_RS18865 | V12G01-02360        | putative regulatory protein                                               | -    | -     |
| N646_RS01995 | V12G01-14985        | probable regulatory protein, MarR family                                  | -    | ++++  |
| N646_RS15990 | V12G01-05376        | transcriptional regulator, LysR family protein                            | -    | ++++  |
| N646_RS11040 | V12G01-10631        | transcriptional activator IlvY                                            | -    | -     |
| N646_RS08170 | V12G01-13919        | chromosome replication initiation inhibitor protein                       | -    | -     |
| N646_RS03250 | V12G01-17872        | probable LysR-family transcriptional regulator                            | -    | -     |
| N646_RS16735 | V12G01-04586        | transcriptional regulator                                                 | -    | -     |
| N646_RS19805 | V12G01-01405        | putative transcriptional regulator                                        | -    | -     |
| N646_RS10270 | V12G01-09717        | transcriptional regulator, ArsR family protein                            | -    | -     |
| N646_RS23700 | V12G01-14189        | hypothetical transcriptional regulator, MarR family protein               | -    | -     |
| N646_RS17005 | V12G01-04291        | transcriptional regulator, AsnC family protein                            | -    | -     |
| N646_RS00765 | V12G01-20341        | leucine-responsive regulatory protein                                     | -    | ++++  |
| N646_RS17345 | V12G01-03946        | transcriptional regulator, LysR family protein                            | -    | ++++  |
| N646_RS13565 | V12G01-13140        | putative phosphate ABC transporter, periplasmic phosphate-binding protein | -    | -     |
| N646_RS11165 | V12G01-10748        | putative transcriptional regulator, LysR family protein                   | -    | -     |
| N646_RS21235 | V12G01-08380        | transcriptional regulator                                                 | -    | ++++  |
| N646_RS01180 | V12G01-19911        | putative ABC transporter, periplasmic substrate-binding protein           | -    | -     |
| N646_RS22975 | V12G01-06356        | Hypothetical transcriptional regulator                                    | -    | -     |
| N646_RS09535 | V12G01-15180        | transcriptional regulator, TetR family protein                            | -    | ++++  |
|              | V12G01-03060        | putative transcriptional regulator                                        | -    | -     |
| N646_RS22955 | V12G01-06381        | putative transcriptional regulator                                        | -    | -     |
| N646_RS18970 | V12G01-02250        | sucrose operon repressor ScrR, putative                                   | -    | -     |
| N646_RS18895 | <b>V12G01-02325</b> | <b>Transcriptional activator</b>                                          | ++++ | ++++  |
| N646_RS03270 | V12G01-17852        | hypothetical protein                                                      | -    | -     |
| N646_RS02315 | V12G01-18762        | transcriptional regulator, LysR family protein                            | -    | -     |
| N646_RS22500 | V12G01-06841        | putative transcriptional regulator                                        | -    | +++++ |
| N646_RS18715 | V12G01-02520        | putative transcriptional regulator                                        | -    | -     |
| N646_RS07755 | <b>V12G01-21538</b> | <b>LuxR</b>                                                               | +++  | +++++ |
| N646_RS19030 | V12G01-02195        | cold shock transcriptional regulator CspA                                 | -    | -     |
| N646_RS18825 | V12G01-02400        | transcriptional regulator, GntR family protein                            | -    | -     |
| N646_RS02695 | V12G01-18362        | putative transcriptional regulator                                        | -    | -     |
| N646_RS20015 | V12G01-01190        | putative transcriptional regulator                                        | -    | -     |
| N646_RS10525 | V12G01-09943        | transcriptional regulator, LysR family protein                            | -    | -     |



|              |                     |                                                                    |             |             |
|--------------|---------------------|--------------------------------------------------------------------|-------------|-------------|
| N646_RS13860 | V12G01-12855        | putative transcriptional regulator, LysR family protein            | -           | -           |
| N646_RS18680 | V12G01-02555        | transcriptional regulator                                          | -           | -           |
| N646_RS18605 | V12G01-02635        | putative transcription regulator protein                           | -           | -           |
| N646_RS18140 | V12G01-03130        | hypothetical protein                                               | -           | -           |
| N646_RS03730 | V12G01-17387        | hypothetical protein                                               | -           | -           |
| N646_RS16360 | V12G01-04996        | putative transcriptional regulator, LysR family protein            | -           | -           |
| N646_RS06165 | V12G01-23133        | AphB, LysR family protein                                          | +++         | -           |
| N646_RS07225 | V12G01-22048        | transcriptional regulator, DeoR family protein                     | -           | -           |
| N646_RS16770 | V12G01-04551        | transcriptional regulator                                          | -           | -           |
| N646_RS07265 | V12G01-22013        | putative LysR-like regular protein                                 | -           | -           |
| N646_RS02790 | V12G01-18262        | putative transcriptional regulator                                 | -           | -           |
| N646_RS18750 | V12G01-02480        | transcriptional regulator, LuxR family protein                     | -           | -           |
| N646_RS18265 | V12G01-02985        | putative transcription activator                                   | -           | -           |
| N646_RS16950 | V12G01-04351        | putative transcriptional regulator                                 | -           | -           |
|              | <b>V12G01-16177</b> | <b>LysR family transcriptional activator MetR</b>                  | <b>+++</b>  | <b>++++</b> |
| N646_RS07180 | V12G01-22098        | transcriptional regulator, LysR family protein                     | -           | -           |
| N646_RS15495 | V12G01-05866        | maltose ABC transporter periplasmic protein                        | -           | -           |
| N646_RS02400 | <b>V12G01-18672</b> | <b>Hypothetical transcriptional regulator, LysR family protein</b> | <b>++++</b> | <b>++++</b> |
| N646_RS22620 | <b>V12G01-06711</b> | <b>transcriptional regulator, LysR family protein</b>              | <b>++++</b> | <b>+++</b>  |
| N646_RS00355 | V12G01-15015        | putative transcriptional regulator protein                         | -           | -           |
| N646_RS10140 | V12G01-09557        | putative transcriptional regulator                                 | -           | -           |
| N646_RS19725 | V12G01-01475        | putative transcriptional regulator                                 | -           | -           |
| N646_RS18270 | V12G01-02980        | transcriptional regulator, LysR family protein                     | -           | -           |
| N646_RS17935 | V12G01-03372        | transcriptional regulator, LysR family protein                     | -           | -           |
| N646_RS20255 | V12G01-09392        | transcriptional regulator, MerR family protein                     | -           | -           |
| N646_RS13555 | V12G01-13150        | DNA-binding response regulator PhoB                                | -           | -           |
| N646_RS20940 | V12G01-08690        | transcriptional regulator, LysR family protein                     | -           | -           |
| N646_RS01315 | V12G01-19771        | hypothetical protein                                               | -           | -           |
| N646_RS18810 | V12G01-02415        | transcriptional regulator                                          | -           | -           |
| N646_RS18780 | V12G01-02450        | putative transcriptional regulator, LysR family protein            | -           | -           |
| N646_RS18860 | V12G01-02365        | transcriptional regulator, LysR family protein                     | -           | -           |
| N646_RS18480 | V12G01-02765        | putative regulatory protein                                        | -           | -           |
| N646_RS04535 | V12G01-16637        | transcriptional regulator TyrR                                     | -           | -           |
| N646_RS21290 | V12G01-08320        | molybdenum ABC transporter, periplasmic molybdenum-binding protein | -           | -           |
| N646_RS22105 | V12G01-07263        | putative transcriptional regulator, LysR family protein            | -           | -           |
| N646_RS11205 | V12G01-10793        | putative transcriptional regulator                                 | -           | -           |
| N646_RS19650 | V12G01-01550        | putative transcriptional regulator                                 | -           | -           |
| N646_RS15735 | V12G01-05631        | putative transcriptional regulator, LuxR family protein vpsT       | +++++       | -           |
| N646_RS00705 | V12G01-20406        | putative transcriptional regulator                                 | -           | -           |
| N646_RS21015 | V12G01-08605        | putative ABC transporter periplasmic solute binding protein        | -           | -           |

|              |              |                                                              |      |   |
|--------------|--------------|--------------------------------------------------------------|------|---|
| N646_RS22180 | V12G01-07188 | transcriptional regulator, LysR family protein               | -    | - |
| N646_RS10770 | V12G01-10261 | transcriptional regulator, LysR family protein               | -    | - |
| N646_RS17515 | V12G01-03781 | ranscriptional regulator, AsnC family protein                | -    | - |
| N646_RS17790 | V12G01-03522 | putative transcriptional regulator CpxR                      | -    | - |
| N646_RS14230 | V12G01-12480 | trehalose repressor                                          | -    | - |
| N646_RS19280 | V12G01-01935 | putative transcription regulator                             | -    | - |
| N646_RS22295 | V12G01-07063 | putative transcriptional regulator                           | -    | - |
| N646_RS03350 | V12G01-17772 | hypothetical transcriptional regulator                       | -    | - |
| N646_RS03335 | V12G01-17787 | hypothetical transcriptional regulator                       | -    | - |
| N646_RS07275 | V12G01-22003 | putative transcriptional regulator, LuxR family protein      | -    | - |
| N646_RS17150 | V12G01-04136 | putative transcriptional regulator, LysR family protein      | -    | - |
| N646_RS15665 | V12G01-05706 | transcriptional regulator, LysR family protein               | -    | - |
| N646_RS17460 | V12G01-03836 | putative LysR-family transcriptional regulatory protein      | ++++ | - |
| N646_RS09840 | V12G01-00090 | zinc-responsive transcriptional regulator                    | -    | - |
| N646_RS07775 | V12G01-21518 | ranscriptional regulator of pyruvate dehydrogenase complex   | -    | - |
| N646_RS10855 | V12G01-13364 | putative transcriptional regulator                           | -    | - |
| N646_RS13255 | V12G01-13429 | sigma-54 dependent transcriptional regulator vpsR            | -    | - |
| N646_RS03260 | V12G01-17862 | Putative transcriptional regulator, LysR family protein      | -    | - |
| N646_RS20805 | V12G01-08835 | fructose repressor                                           | -    | - |
| N646_RS20710 | V12G01-08930 | transcriptional regulator, AraC family protein               | -    | - |
| N646_RS14060 | V12G01-12635 | transcriptional regulator Crl                                | -    | - |
| N646_RS13690 | V12G01-13025 | hypothetical protein                                         | -    | - |
| N646_RS11160 | V12G01-10743 | gluconate utilization system Gnt-I transcriptional repressor | -    | - |
| N646_RS20210 | V12G01-00995 | ribose operon repressor                                      | -    | - |
| N646_RS22540 | V12G01-10441 | cold shock transcriptional regulator CspA                    | -    | - |
| N646_RS00985 | V12G01-20111 | putative transcriptional regulator                           | -    | - |
| N646_RS00825 | V12G01-20266 | putative transcriptional regulator                           | -    | - |
| N646_RS22990 | V12G01-06346 | putative regulatory protein, ArsR family                     | -    | - |
| N646_RS00470 | V12G01-20643 | DNA-binding response regulator TorR                          | -    | - |
| N646_RS07430 | V12G01-21838 | transcriptional regulator, MarR family protein               | -    | - |
| N646_RS09670 | V12G01-00930 | transcriptional regulator, LuxR family protein               | -    | - |
| N646_RS09630 | V12G01-00970 | transcriptional regulator CpxR                               | -    | - |
| N646_RS17935 | V12G01-03365 | transcriptional regulator, LysR family protein               | -    | - |
| N646_RS08450 | V12G01-14099 | transcriptional regulator, LacI family protein               | -    | - |
| N646_RS11065 | V12G01-10656 | transcriptional regulator, TetR family protein               | -    | - |
| N646_RS01205 | V12G01-19886 | putative transcriptional regulator                           | -    | - |
| N646_RS01735 | V12G01-19317 | putative transcription regulator                             | -    | - |
| N646_RS19210 | V12G01-02010 | putative transcriptional regulator                           | -    | - |
| N646_RS05480 | V12G01-23725 | fatty acid metabolism regulator                              | -    | - |
| N646_RS12685 | V12G01-12238 | mannitol operon repressor                                    | -    | - |
| N646_RS17920 | V12G01-03392 | putative transcriptional regulator                           | -    | - |
| N646_RS17985 | V12G01-03305 | putative transcriptional regulator                           | -    | - |
| N646_RS01070 | V12G01-20021 | psp operon transcriptional activator                         | -    | - |

|              |              |                                                                   |       |   |
|--------------|--------------|-------------------------------------------------------------------|-------|---|
| N646_RS09170 | V12G01-14850 | putative transcriptional regulator                                | -     | - |
| N646_RS04685 | V12G01-16507 | transcriptional regulator, LuxR family protein                    | -     | - |
| N646_RS08210 | V12G01-13959 | putative transcriptional regulator                                | -     | - |
| N646_RS19200 | V12G01-02020 | putative GntR-family regulatory protein                           | -     | - |
| N646_RS19395 | V12G01-01805 | nitrate/nitrite response regulator protein                        | -     | - |
| N646_RS19305 | V12G01-01910 | putative transcriptional regulator                                | -     | - |
| N646_RS19080 | V12G01-02145 | putative DNA-binding response regulator                           | -     | - |
| N646_RS18905 | V12G01-02315 | transcriptional regulator, LysR family protein                    | -     | - |
| N646_RS18740 | V12G01-02490 | spermidine/putrescine ABC transporter                             | -     | - |
| N646_RS18445 | V12G01-02800 | transcriptional regulator                                         | -     | - |
| N646_RS18210 | V12G01-03040 | ABC-type Fe <sup>3+</sup> transport system, periplasmic component | -     | - |
| N646_RS18175 | V12G01-03095 | putative transcriptional regulator, TetR family protein           | -     | - |
| N646_RS18110 | V12G01-03160 | putative transcriptional regulator (repressor protein)            | -     | - |
| N646_RS03740 | V12G01-17377 | response regulator                                                | -     | - |
| N646_RS03370 | V12G01-17752 | transcriptional regulator, putative                               | -     | - |
| N646_RS03360 | V12G01-17762 | putative transcriptional regulator, LysR family protein           | -     | - |
| N646_RS03235 | V12G01-17887 | Hypothetical transcriptional regulator                            | -     | - |
| N646_RS21820 | V12G01-07463 | putative TetR-family protein                                      | -     | - |
| N646_RS21620 | V12G01-07658 | transcriptional regulator, LysR family protein                    | -     | - |
| N646_RS15740 | V12G01-05626 | putative transcriptional regulator, LuxR family protein<br>VpsT   | -     | - |
| N646_RS01950 | V12G01-19117 | putative transcriptional regulator                                | -     | - |
| N646_RS02665 | V12G01-18392 | ROK family protein                                                | -     | - |
| N646_RS07260 | V12G01-22018 | regulator of ebg operon                                           | -     | - |
| N646_RS15370 | V12G01-06006 | LuxT                                                              | -     | - |
| N646_RS12640 | V12G01-12193 | transcriptional regulator, LysR family protein                    | -     | - |
| N646_RS17045 | V12G01-04246 | transcriptional regulator, AraC/XylS family protein               | -     | - |
| N646_RS15565 | V12G01-05796 | putative transcriptional regulator                                | -     | - |
| N646_RS01550 | V12G01-19507 | hypothetical protein                                              | -     | - |
| N646_RS12650 | V12G01-12203 | transcriptional regulator, DeoR family protein                    | -     | - |
| N646_RS01700 | V12G01-19352 | transcriptional regulator, LysR family protein                    | -     | - |
| N646_RS01995 | V12G01-19072 | transcriptional regulator, MarR family protein                    | -     | - |
| N646_RS22540 | V12G01-23293 | cold shock transcriptional regulator CspA                         | -     | - |
| N646_RS12150 | V12G01-11743 | transcriptional repressor, LacI family protein                    | -     | - |
| N646_RS22880 | V12G01-06456 | transcriptional regulator, LysR family protein                    | -     | - |
| N646_RS15810 | V12G01-05561 | phosphate ABC transporter, periplasmic phosphate-binding protein  | -     | - |
| N646_RS01285 | V12G01-19801 | Na <sup>+</sup> /H <sup>+</sup> -antiporter protein               | -     | - |
| N646_RS04975 | V12G01-16237 | putative transcriptional regulator                                | ++++  | - |
| N646_RS17500 | V12G01-03796 | putative transcriptional regulator                                | ++++  | - |
| N646_RS17050 | V12G01-04241 | transcriptional regulator, LuxR family protein vqmA               | +++++ | - |
| N646_RS15605 | V12G01-05756 | anaerobic nitric oxide reductase transcription regulator          | -     | - |
| N646_RS22540 | V12G01-06801 | cold shock transcriptional regulator CspA                         | +++++ | - |

|              |              |                                                                      |   |   |
|--------------|--------------|----------------------------------------------------------------------|---|---|
| N646_RS13315 | V12G01-13359 | transcriptional activator protein NhaR                               | - | - |
| N646_RS20645 | V12G01-08990 | putative transcriptional regulator                                   | - | - |
| N646_RS20480 | V12G01-09155 | putative transcription regulator protein                             | - | - |
| N646_RS13600 | V12G01-13110 | phosphate transport system regulatory protein PhoU                   | - | - |
| N646_RS21320 | V12G01-08290 | putative AraC-family transcriptional regulatory protein              | - | - |
| N646_RS21210 | V12G01-08410 | putative transcriptional regulator                                   | - | - |
|              | V12G01-08475 | hypothetical protein                                                 | - | - |
| N646_RS22430 | V12G01-06918 | putative transcriptional regulator                                   | - | - |
| N646_RS22285 | V12G01-07073 | transcriptional regulator, GntR family/amidohydrolase family protein | - | - |
| N646_RS08590 | V12G01-14244 | BolA/YrbA family protein                                             | - | - |
| N646_RS13065 | V12G01-13629 | transcriptional regulator, LysR family protein                       | - | - |
| N646_RS17405 | V12G01-03891 | putative transcription regulator protein                             | - | - |
| N646_RS23150 | V12G01-06186 | putative transcriptional regulator, MerR family protein              | - | - |
| N646_RS23140 | V12G01-06196 | hypothetical protein                                                 | - | - |
| N646_RS10980 | V12G01-10036 | putative transcriptional regulator, LysR family protein              | - | - |
| N646_RS10065 | V12G01-09472 | transcriptional regulator, LysR family protein                       | - | - |
| N646_RS10070 | V12G01-09477 | hypothetical protein                                                 | - | - |
| N646_RS16955 | V12G01-04346 | putative transcriptional regulator                                   | - | - |
| N646_RS17315 | V12G01-03976 | putative transcriptional regulator, GntR family protein              | - | - |
| N646_RS17230 | V12G01-04061 | hypothetical protein                                                 | - | - |
| N646_RS16600 | V12G01-04736 | transcriptional regulator MaIT                                       | - | - |
| N646_RS16300 | V12G01-05056 | putative transcriptional regulator                                   | - | - |
| N646_RS01560 | V12G01-19497 | putative transcriptional regulator                                   | - | - |
| N646_RS19945 | V12G01-01260 | putative transcriptional regulator                                   | - | - |
| N646_RS19610 | V12G01-01590 | putative transcriptional regulator                                   | - | - |
| N646_RS22250 | V12G01-07108 | putative transcriptional regulator                                   | - | - |
| N646_RS12680 | V12G01-12233 | putative glycerol metabolism operon regulatory protein               | - | - |
| N646_RS07645 | V12G01-21628 | putative transcriptional regulator                                   | - | - |
| N646_RS14955 | V12G01-15827 | putative transcriptional regulator                                   | - | - |
| N646_RS05320 | V12G01-00774 | putative transcriptional regulator                                   | - | - |
| N646_RS00050 | V12G01-00372 | putative transcriptional regulator                                   | - | - |
| N646_RS12465 | V12G01-12013 | putative transcriptional regulator                                   | - | - |
| N646_RS18710 | V12G01-02525 | putative periplasmic solute-binding protein                          | - | - |
| N646_RS10840 | V12G01-10191 | putative transcriptional regulator                                   | - | - |
| N646_RS04680 | V12G01-16512 | transcriptional regulator, MarR family protein                       | - | - |
| N646_RS18120 | V12G01-03150 | putative transcription regulator protein                             | - | - |
| N646_RS20765 | V12G01-08875 | putative transcriptional regulator                                   | - | - |
| N646_RS13620 | V12G01-13085 | putative transcriptional regulator                                   | - | - |
| N646_RS19800 | V12G01-01410 | putative transcriptional regulator                                   | - | - |
| N646_RS01155 | V12G01-19936 | putative transcriptional regulator                                   | - | - |
| N646_RS22400 | V12G01-06948 | putative transcriptional regulator                                   | - | - |
| N646_RS04635 | V12G01-16557 | transcriptional regulator, GntR family protein                       | - | - |
| N646_RS10475 | V12G01-09893 | putative transcriptional regulator                                   | - | - |

|              |              |                                                                     |   |   |
|--------------|--------------|---------------------------------------------------------------------|---|---|
| N646_RS00460 | V12G01-20653 | putative transcriptional regulator                                  | - | - |
| N646_RS19215 | V12G01-02005 | putative transcriptional regulator, LysR family protein             | - | - |
| N646_RS17610 | V12G01-03681 | putative transcriptional regulator                                  | - | - |
| N646_RS00095 | V12G01-21343 | putative transcriptional regulator                                  | - | - |
| N646_RS19130 | V12G01-02095 | hypothetical protein                                                | - | - |
| N646_RS18450 | V12G01-02795 | HTH-type transcriptional regulator eutR                             | - | - |
| N646_RS18430 | V12G01-02815 | putative transcriptional regulator                                  | - | - |
| N646_RS18045 | V12G01-03230 | putative transcriptional regulator                                  | - | - |
| N646_RS18225 | V12G01-03025 | putative repressor protein PhnR                                     | - | - |
|              | V12G01-16722 | prophage LambdaSo, transcriptional regulator, Cro/C1 family protein | - | - |
|              | V12G01-16787 | transcriptional regulator, XRE family protein                       | - | - |
| N646_RS03775 | V12G01-17342 | putative transcriptional regulator, LysR family protein             | - | - |
| N646_RS03705 | V12G01-17427 | sigma-54 dependent transcriptional regulator                        | - | - |
| N646_RS03680 | V12G01-17452 | transcriptional regulator ExsA                                      | - | - |
|              | V12G01-07783 | Predicted transcriptional regulator                                 | - | - |
|              | V12G01-08043 | hypothetical protein                                                | - | - |
|              | V12G01-08088 | hypothetical protein                                                | - | - |
|              | V12G01-08143 | hypothetical protein                                                | - | - |
| N646_RS03280 | V12G01-17842 | putative transcriptional regulator protein                          | - | - |
| N646_RS21360 | V12G01-08243 | transcriptional regulator, ArsR family protein                      | - | - |
|              | V12G01-08247 | putative transcriptional regulator                                  | - | - |
| N646_RS16925 | V12G01-04376 | transcriptional regulator, MarR family protein                      | - | - |
| N646_RS06080 | V12G01-23363 | hypothetical protein                                                | - | - |
| N646_RS09100 | V12G01-14775 | transcriptional regulator, LysR family protein                      | - | - |
| N646_RS00750 | V12G01-20356 | transcriptional regulator for cysteine regulon                      | - | - |
| N646_RS09355 | V12G01-15050 | hypothetical protein                                                | - | - |
| N646_RS16430 | V12G01-04926 | transcriptional regulator, LysR family protein                      | - | - |
| N646_RS16535 | V12G01-04821 | putative acetyltransferase                                          | - | - |
| N646_RS12615 | V12G01-12168 | transcriptional regulator, LysR family protein                      | - | - |
| N646_RS15065 | V12G01-00662 | transcriptional activator TtdR; Provisional                         | - | - |
| N646_RS13320 | V12G01-13354 | transcriptional activator HlyU                                      | - | - |
|              | V12G01-04416 | transcriptional regulator, AraC family protein                      | - | - |
| N646_RS07310 | V12G01-21963 | putative transcriptional regulator, LysR family protein             | - | - |
|              | V12G01-23333 | AraC-family transcriptional regulator                               | - | - |
|              | V12G01-23238 | putative transcriptional regulator                                  | - | - |
|              | V12G01-23253 | DNA-binding response regulator                                      | - | - |
| N646_RS03430 | V12G01-17692 | transcriptional regulator, GntR family protein                      | - | - |
|              | V12G01-21213 | transcriptional regulator                                           | - | - |
|              | V12G01-21228 | putative transcriptional regulator, LysR family protein             | - | - |
|              | V12G01-21248 | transcriptional regulator, LysR family protein                      | - | - |

41 <sup>a, b</sup> The accession numbers in the genome sequence of *V. alginolyticus* EPGS and 12G01 strains,  
42 respectively.  
43
